# Supplementary material for: Malaria vaccines since 2000: progress, priorities, products
Source: PubMed Central journal article supplement (PMC7283239; doi:10.1038/s41541-020-0196-3), 2020-06-09
Supplement: 41541_2020_196_MOESM1_ESM.pdf [file 41541_2020_196_MOESM1_ESM.pdf]

**1 SUPPLEMENTARY MATERIAL**

- 2 Supplementary Data Set 1. Detailed list of malaria vaccine clinical trials registered at**  
**3 ClinicalTrials.gov since 2000, including study title, status, intervention, enrollment,**  
**4 start date, location, and vaccine target.**
